# Supplementary material for: Activation of uranyl peroxides by ionizing radiation prior to uranyl carbonate formation
Source: Royal Society of Chemistry journal article supplement (doi:10.1039/d4dt01841a), 2024-01-01
Supplement: d4dt01841a1.pdf [file d4dt01841a1.pdf]

## Activation of uranyl peroxides by ionizing radiation prior to uranyl carbonate formation

Zoe C. Emory,<sup>1</sup> Jay A. LaVerne,<sup>2,3</sup> Peter C. Burns<sup>1,4\*</sup>

<sup>1</sup>Department of Chemistry and Biochemistry, University of Notre Dame, Notre Dame, Indiana 46556, USA

<sup>2</sup>Radiation Laboratory, University of Notre Dame, Notre Dame Indiana 46556, USA

<sup>3</sup>Department of Physics and Astronomy, University of Notre Dame, Notre Dame Indiana 46556, USA

<sup>4</sup>Department of Civil and Environmental Engineering and Earth Sciences, University of Notre Dame, Notre Dame, Indiana 46556, USA

\*pburns@nd.edu

### Electrospray ionization mass spectrometry (ESI-MS)

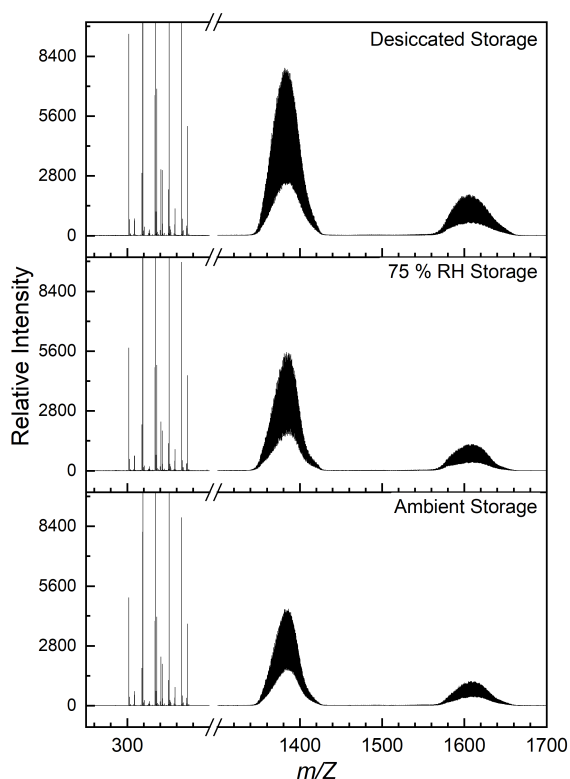

**Figure S1.** Electrospray ionization mass-spectrometry with ion filtering and collision induced dissociation. This figure highlights the unique fingerprint of the  $U_{28}$  cluster despite different storage environments.

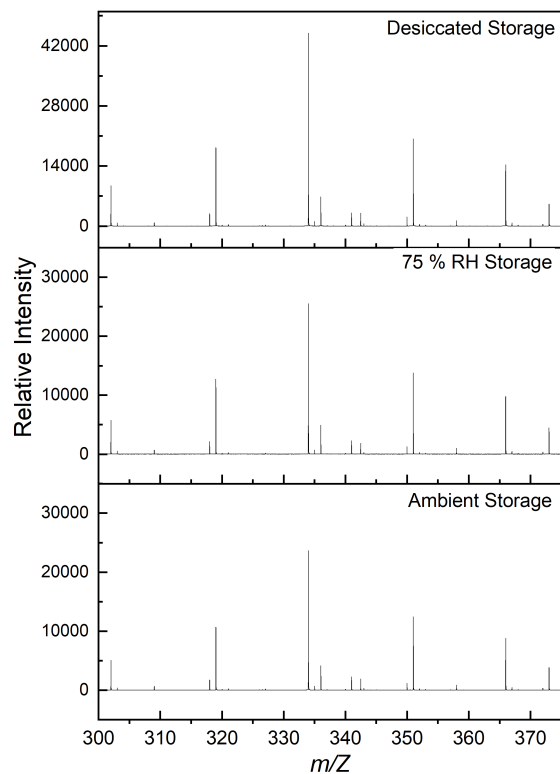

**Figure S2.** Electrospray ionization mass-spectrometry with ion filtering and collision induced dissociation. Zoomed in to lower  $m/z$ .

Figure S1 and Figure S2 show ESI-MS of dissolved  $\text{Li-U}_{28}$  salts ( $\sim 200$  ppm) after storage in ambient, 75 % relative humidity (RH), or desiccated conditions. The plots in Figures S1 and S2 result from tandem MS with collision induced dissociation (CID) following the methods developed by Rodriguez et al.<sup>1</sup> Ion filtering was done, selecting for ions at 1375  $m/z$  with a window of  $\pm 70$   $m/z$ . This corresponds to a mass of the  $\text{U}_{28}$  cluster anionic shell, affiliated  $\text{Li}^+$  counter cations to give the associated charge state of -7 and -6 and additional water molecules associated with the cluster. Figure S2 highlights the low  $m/z$  region where anionic  $\text{UO}_x^-$  fragments are observed, where  $x=4-8$ , unique to  $\text{U}_{28}$ .

## Single Crystal X-ray Diffraction

**Table S1.** Crystallographic Data for Li-U<sub>28</sub> Confirmation

| <i>Crystal Data</i>                                                            | <b>1</b>                                                                               |
|--------------------------------------------------------------------------------|----------------------------------------------------------------------------------------|
| Formula                                                                        | (Li <sub>28</sub> [(UO <sub>2</sub> ) <sub>28</sub> (O <sub>2</sub> ) <sub>42</sub> ]) |
| Formula Weight                                                                 | 2274.79                                                                                |
| Crystal system                                                                 | Tetragonal                                                                             |
| Space Group                                                                    | <i>P</i> -42 <sub>1</sub> <i>c</i>                                                     |
| Temperature (K)                                                                | 130                                                                                    |
| <i>a</i> (Å)                                                                   | 20.28178(17)                                                                           |
| <i>c</i> (Å)                                                                   | 26.8954(3)                                                                             |
| <i>V</i> (Å <sup>3</sup> )                                                     | 11063.4(2)                                                                             |
| <i>Z</i>                                                                       | 8                                                                                      |
| $\rho_{\text{calc}}$ (g cm <sup>-3</sup> )                                     | 2.731                                                                                  |
| $\mu$ (mm <sup>-1</sup> )                                                      | 20.482                                                                                 |
| <i>F</i> (000)                                                                 | 7560                                                                                   |
| Crystal Size (mm <sup>3</sup> )                                                | 0.1 x 0.1 x 0.1                                                                        |
| Crystal Color                                                                  | Yellow                                                                                 |
| <hr/> <i>Data collection</i> <hr/>                                             |                                                                                        |
| Diffractometer                                                                 | Rigaku XtaLAB Synergy                                                                  |
| $\lambda$ (Å)                                                                  | MoK $\alpha$ , 0.71073                                                                 |
| $\mu$ (mm <sup>-1</sup> )                                                      | 20.48                                                                                  |
| Data Range $\theta$ (°)                                                        | 1.817 – 33.886                                                                         |
| Limits <i>h</i> , <i>k</i> , <i>l</i>                                          | -28 < <i>h</i> < 29<br>-26 < <i>k</i> < 20<br>-39 < <i>l</i> < 34                      |
| Measured reflections                                                           | 69781                                                                                  |
| Total reflections( <i>N</i> <sub>2</sub> ), observed ( <i>N</i> <sub>1</sub> ) | 18884, 16607                                                                           |
| Criterion for observed reflections                                             | <i>I</i> > 2 $\sqrt{I}$                                                                |
| <i>R</i> <sub>int</sub> (%)                                                    | 0.0394                                                                                 |
| <hr/> <i>Refinement</i> <hr/>                                                  |                                                                                        |
| Refinement                                                                     | Full-matrix least-squares on <i>F</i> <sup>2</sup>                                     |
| <i>R</i> <sub>1</sub> , <i>wR</i> <sub>2</sub> for <i>N</i> <sub>2</sub>       | 0.0513, 0.1215                                                                         |
| <i>R</i> <sub>1</sub> , <i>wR</i> <sub>2</sub> for <i>N</i> <sub>1</sub>       | 0.0439, 0.1177                                                                         |
| Goof (Goodness of fit)                                                         | 1.114                                                                                  |
| $\Delta\rho_{\text{max}}$ , $\Delta\rho_{\text{min}}$ (e Å <sup>-3</sup> )     | 2.971, -1.736                                                                          |

## Gas Chromatography

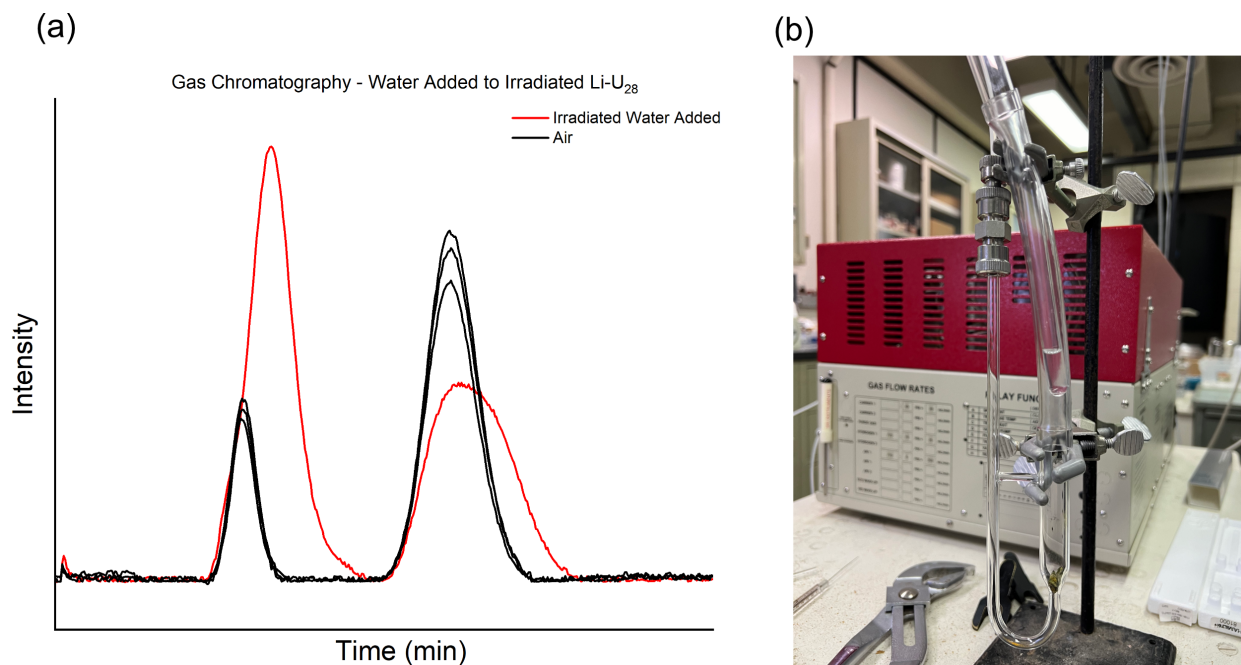

**Figure S3.** (a) Gas chromatography of air (black trace) and gas evolved from irradiated Li-U<sub>28</sub> material (red trace) immersed in water. The sample was irradiated to 42 MGy with under dry argon and stored in a desiccated environment. (b) 1 mL of helium flushed water was added to the material in a U-shaped tube.

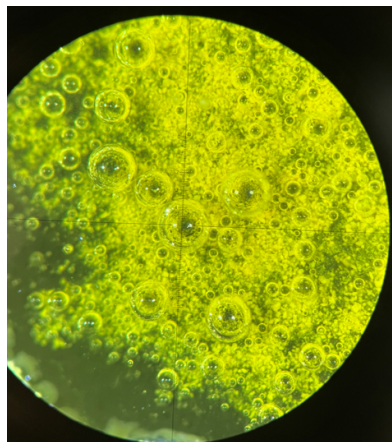

**Figure S4.** Water added to Li-U<sub>28</sub> irradiated to 42 MGy with He<sup>2+</sup> ions under a dry Ar flow.

Gas chromatography (GC) was done to confirm the gas evolved from irradiated Li-U<sub>28</sub> is O<sub>2</sub>. Li-U<sub>28</sub> irradiated in dry conditions evolved gas when water was added to the irradiated material, however, Li-U<sub>28</sub> irradiated under hydrated conditions did not. Samples irradiated in dry conditions contained an extraneous peak in the Raman spectra at 1553 cm<sup>-1</sup> that tentatively was assigned to O<sub>2</sub>, based on published literature values.<sup>2</sup> This was confirmed by measuring the gas evolved from Li-U<sub>28</sub> irradiated and stored in dry conditions exposed to water.

1.0 mL of 18M $\Omega$  ultrapure water was purged with high purity helium gas in a glass ampule for 10 minutes and subsequently flame sealed, avoiding atmospheric exposure. The ampule was inserted into the GC above the irradiated material and the system was purged with helium. Once the baselines were collected, the glass ampule was crushed allowing the water to mix with the irradiated material below it. Gas production was observed, and data was collected.

### X-ray Photoelectron Spectroscopy (XPS)

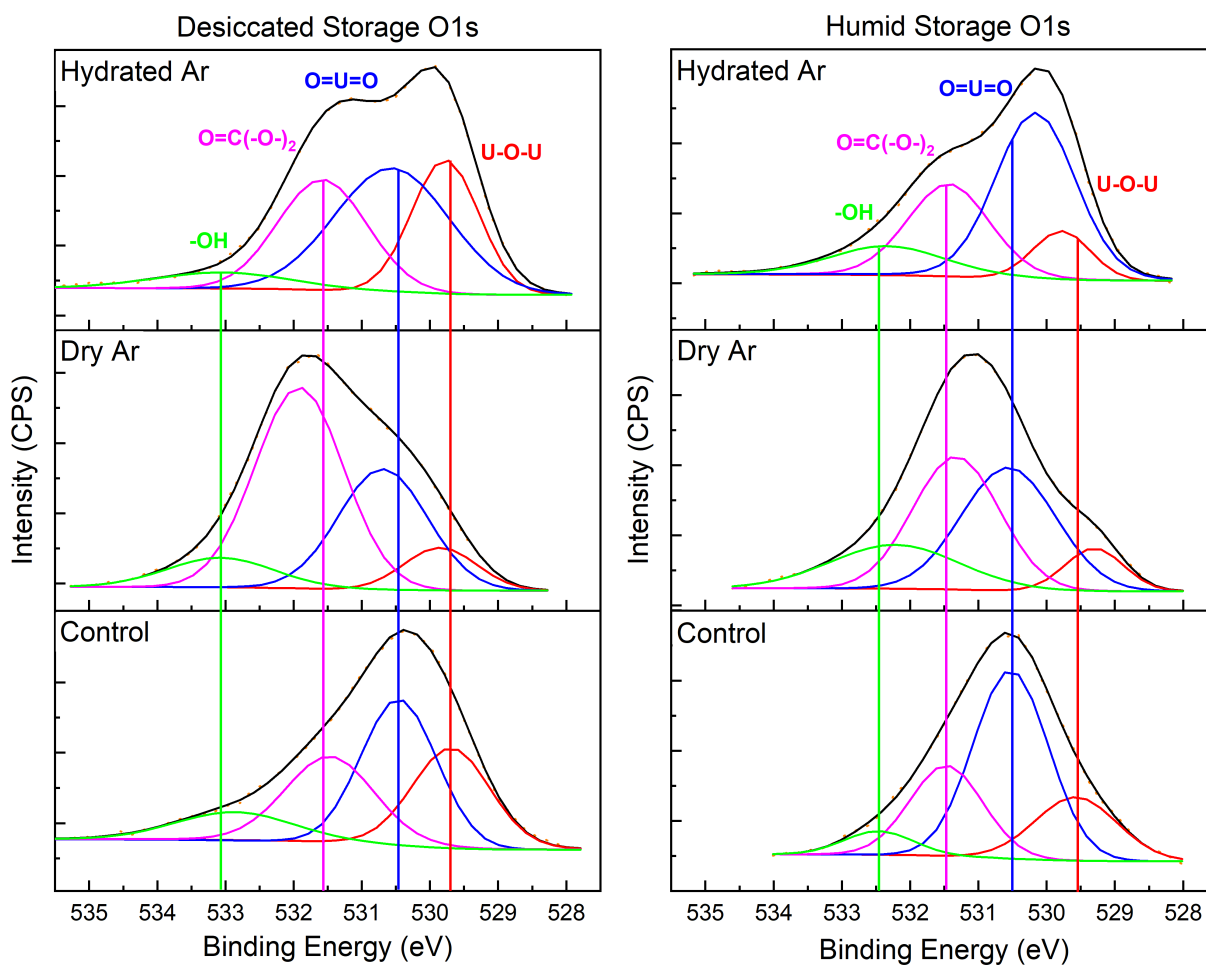

**Figure S5.** XPS of O1s envelopes for control and 42 MGy irradiated Li-U<sub>28</sub> kept in desiccated storage (left) 75 % RH storage (right) and hydrated or dry argon flow during He<sup>2+</sup> ion irradiation (top, middle, respectively).

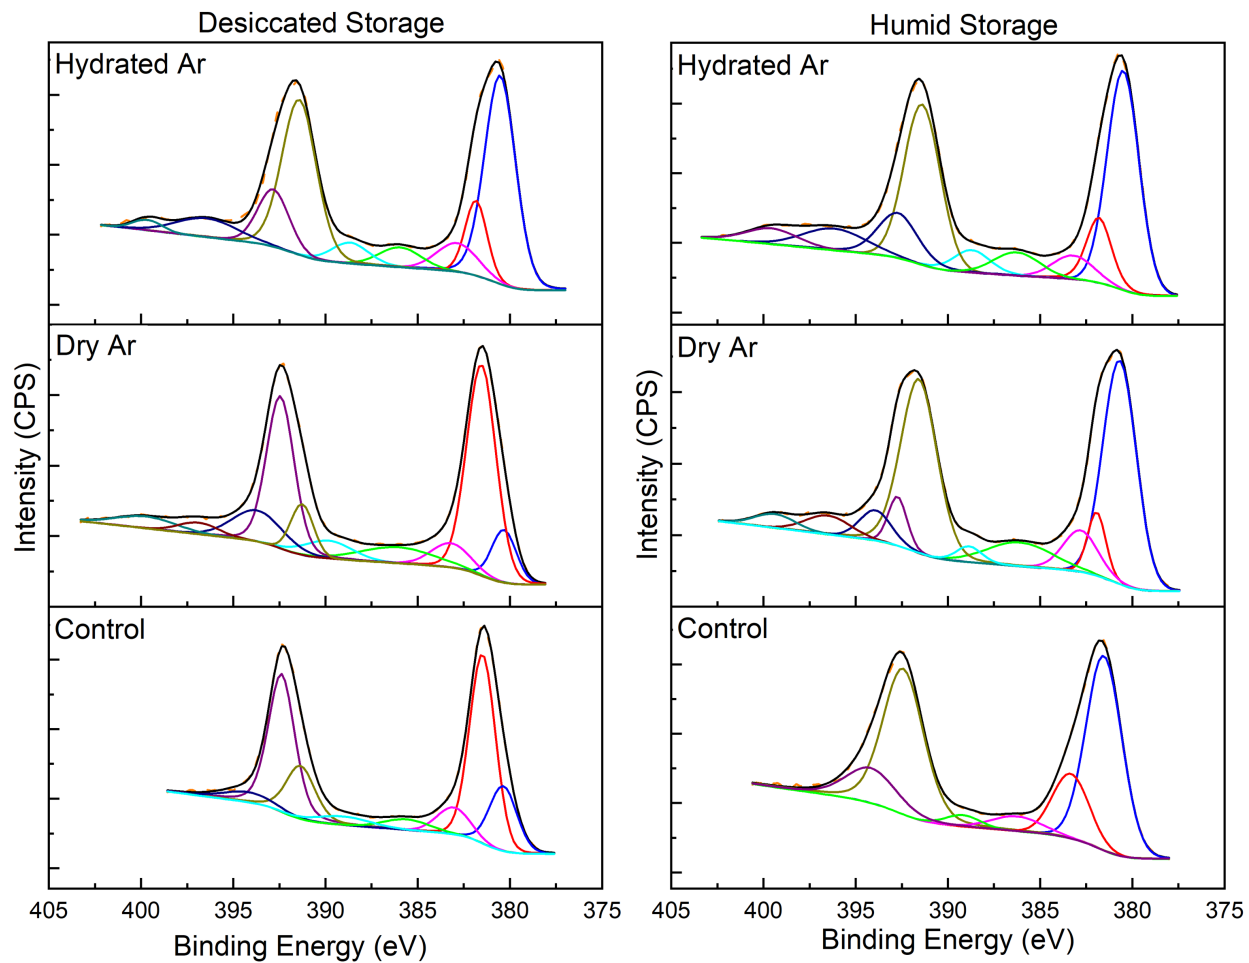

**Figure S6.** XPS of  $U4f_{5/2}$   $U4f_{7/2}$  binding envelopes for 42 MGy irradiated  $Li-U_{28}$  kept in desiccated storage (left) 75 % RH storage (right) and hydrated or dry argon flow during irradiation (top, middle, respectively).

## EPR

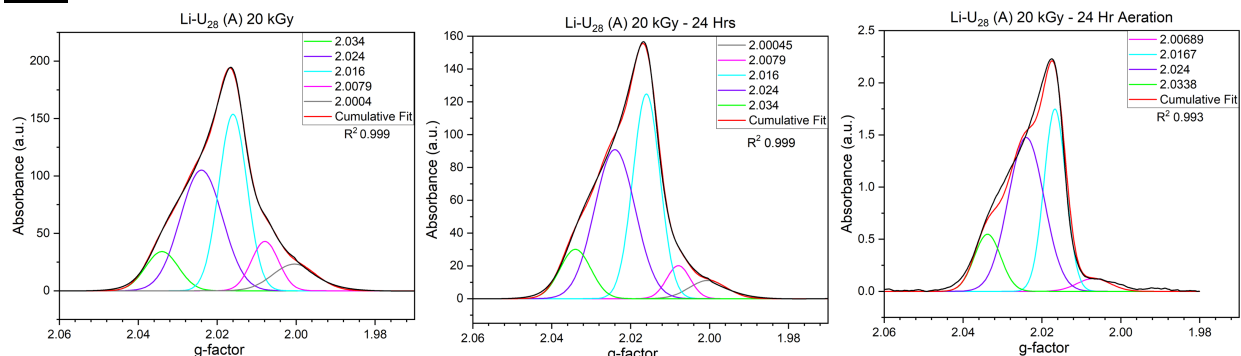

**Figure S7.** Left: fit absorbance spectra of Li-U<sub>28</sub>  $\gamma$ -irradiated to 20 kGy (black) from integrated EPR spectra, middle: fit absorbance spectra of Li-U<sub>28</sub>  $\gamma$ -irradiated to 20 kGy (black) and aged sealed for 24 hours from integrated EPR spectra, right: fit absorbance spectra of Li-U<sub>28</sub>  $\gamma$ -irradiated to 20 kGy (black) and aged sealed for 24 hours then aerated for an additional 24 hours from integrated EPR spectra. Take note of difference in peak intensities across graphs.

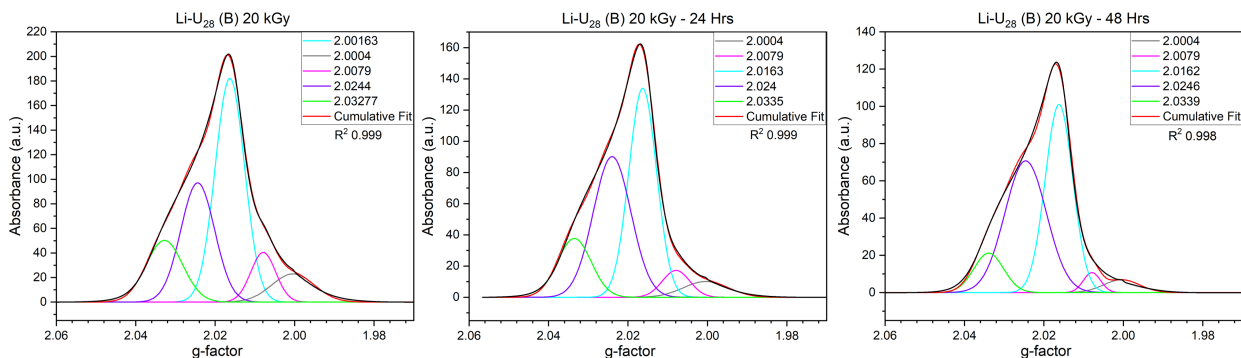

**Figure S8.** Left: fit absorbance spectra of Li-U<sub>28</sub>  $\gamma$ -irradiated to 20 kGy (black) from integrated EPR spectra, middle: fit absorbance spectra of Li-U<sub>28</sub>  $\gamma$ -irradiated to 20 kGy (black) and aged sealed for 24 hours from integrated EPR spectra, right: fit absorbance spectra of Li-U<sub>28</sub>  $\gamma$ -irradiated to 20 kGy (black) and aged sealed for 48 hours from integrated EPR spectra. Take note of difference in peak intensities across graphs.

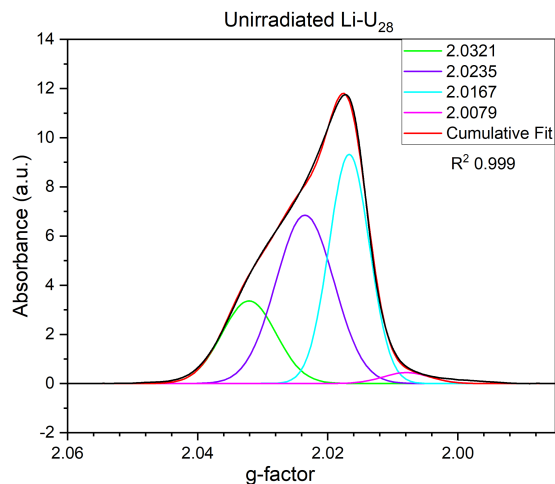

**Figure S9.** Fit absorbance of unirradiated Li-U<sub>28</sub> from integrated EPR spectra.

## CO<sub>3</sub><sup>2-</sup> ν<sub>1</sub> in Raman Spectra

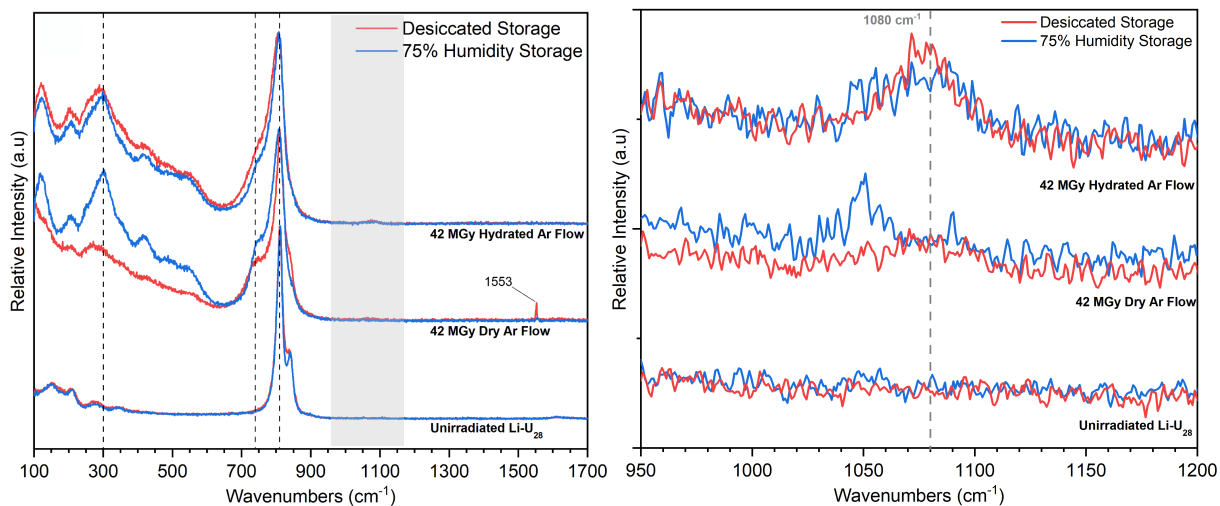

**Figure S10.** Raman spectra of He<sup>2+</sup> ion irradiated Li-U<sub>28</sub> to 42 MGy. Stacked plots reference either dry or hydrated Ar flow over the surface of the sample during irradiation. Red traces are for samples stored in desiccated environments; blue traces are for samples stored in 75% relative humidity environments. The right plot is zoomed in centered at the small peak at 1080 cm<sup>-1</sup>, assigned to the symmetric stretch (ν<sub>1</sub>) of carbonate.

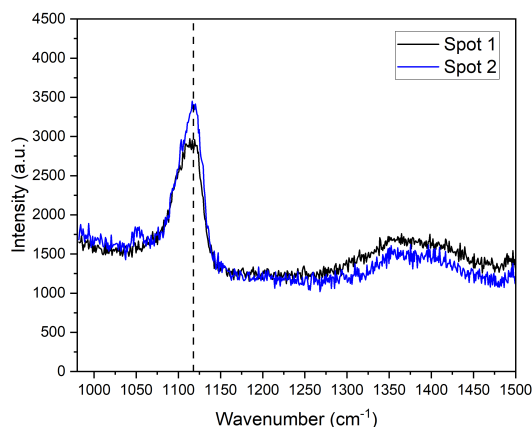

**Figure S11.** Raman spectra of He<sup>2+</sup> irradiated Li-U<sub>28</sub> to 42 MGy. Raman spectra were collected as static scans (950-1500 cm<sup>-1</sup>), 3s exposure, 5 accumulations, 0.5% laser power.

Figures S10 and S11 highlight the symmetric carbonate stretch present in the Raman spectra of He<sup>2+</sup> irradiated Li-U<sub>28</sub>. The extended scans presented in Figure S10 range from 100-2000 cm<sup>-1</sup> and include the very intense symmetric uranyl stretch, ultimately making the CO<sub>3</sub><sup>2-</sup> ν<sub>1</sub> vibrational mode appear very small. The static scan narrowed to wavenumbers excluding the uranyl ν<sub>1</sub> stretch and including carbonate ν<sub>1</sub> mode confirms its presence.

## References

- (1) Rodriguez, V. G.; Culbertson, H. J.; Sigmon, G. E.; Burns, P. C. Electrochemistry of Uranyl Peroxide Solutions during Electrospray Ionization. *Inorg. Chem.* **2023**. <https://doi.org/10.1021/acs.inorgchem.2c03904>.



- (2) Weber, A.; McGinnis, E. A. The Raman Spectrum of Gaseous Oxygen. *J. Mol. Spectrosc.* **1960**, *4* (1–6), 195–200. [https://doi.org/10.1016/0022-2852\(60\)90081-3](https://doi.org/10.1016/0022-2852(60)90081-3).
